# Supplementary material
Source: PubMed Central journal article supplement (PMC5975264)
Supplement: NIHMS757197-supplement.pdf [file NIHMS757197-supplement.pdf]

## Supporting Information

### **Nanofibrous Spongy Microspheres for the Delivery of Hypoxia-primed Human Dental Pulp Stem Cells to Regenerate Vascularized Dental Pulp**

Rong Kuang, Zhanpeng Zhang, Xiaobing Jin, Jiang Hu, Songtao Shi, Longxing Ni, Peter X. Ma

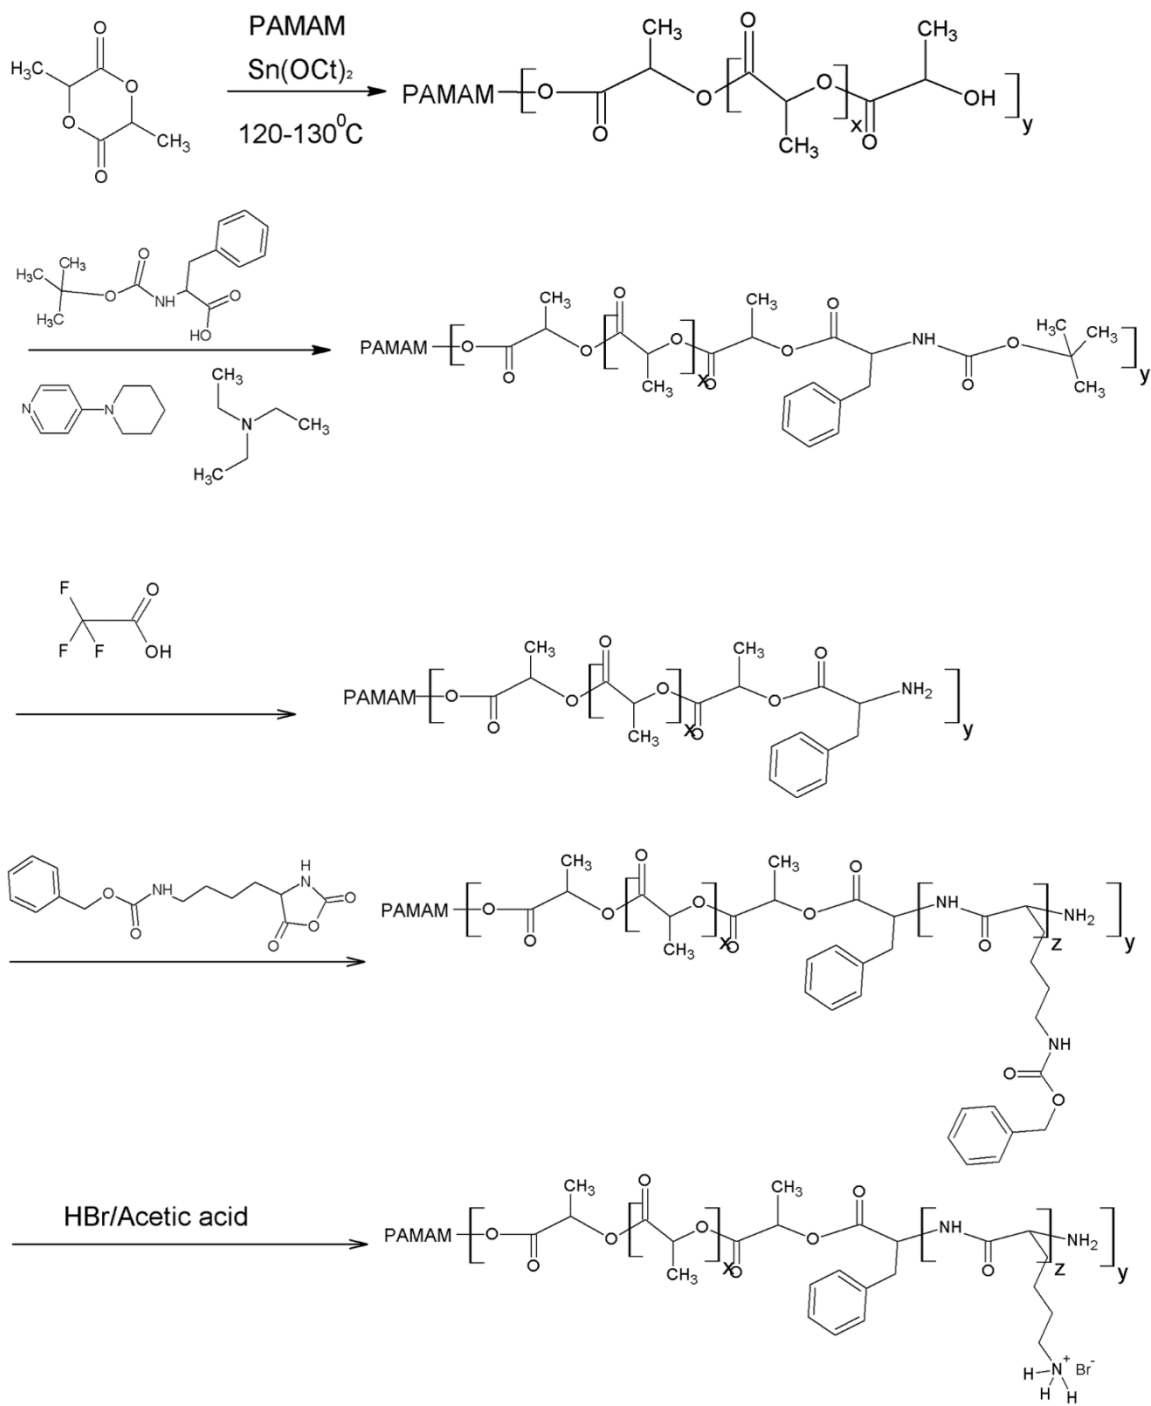

**Figure S1.** A schematic illustration of the synthesis route of star-shaped block copolymer SS-PLLA-b-PLYS.
